# Supplementary material for: Seasonal and Spatial Variation of Dissolved Oxygen and Nutrients in Padaviya Reservoir, Sri Lanka
Source: Hindawi journal article supplement (doi:10.1155/2019/5405016), 2019-04-08
Supplement: f1 [file 5405016.f1.pdf]

| Depth(m) | Ammonia (mg/L) | Nitrite (mg/L) | Nitrate (mg/L) | Reactive phosphate (mg/L) | Conductivity (μS/cm) | DO (mg/L) | pH   | Temperature (°C) |
|----------|----------------|----------------|----------------|---------------------------|----------------------|-----------|------|------------------|
| 0.00     | 0.07           | 0.09           | 0.50           | 0.24                      | 180                  | 7.55      | 8.30 | 28.83            |
| 0.50     | 0.13           | 0.16           | 0.46           | 0.23                      | 185                  | 7.39      | 8.30 | 28.83            |
| 1.00     | 0.17           | 0.18           | 0.43           | 0.23                      | 189                  | 7.25      | 8.30 | 28.60            |
| 1.50     | 0.10           | 0.23           | 0.41           | 0.25                      | 200                  | 7.06      | 8.25 | 28.60            |
| 2.00     | 0.12           | 0.22           | 0.32           | 0.26                      | 207                  | 5.86      | 7.98 | 28.27            |
| 2.50     | 0.13           | 0.23           | 0.27           | 0.27                      | 215                  | 4.85      | 7.85 | 28.13            |
| 3.00     | 0.23           | 0.22           | 0.27           | 0.27                      | 225                  | 4.46      | 7.53 | 28.10            |
| 3.50     | 0.27           | 0.23           | 0.27           | 0.28                      | 240                  | 3.87      | 7.37 | 28.10            |
| 4.00     | 0.32           | 0.25           | 0.25           | 0.29                      | 246                  | 3.81      | 7.35 | 28.10            |
| 4.50     | 0.34           | 0.23           | 0.25           | 0.30                      | 253                  | 3.46      | 7.29 | 28.03            |
| 5.00     | 0.37           | 0.23           | 0.22           | 0.30                      | 296                  | 3.05      | 7.27 | 27.87            |
| 5.50     | 0.42           | 0.22           | 0.20           | 0.31                      | 321                  | 2.52      | 7.25 | 27.87            |
| 6.00     | 0.44           | 0.32           | 0.20           | 0.32                      | 401                  | 0.31      | 7.25 | 27.87            |
| 6.50     | 0.61           | 0.53           | 0.06           | 0.33                      | 425                  | 0.23      | 7.23 | 27.87            |
| 7.00     | 0.82           | 0.55           | 0.05           | 0.45                      | 452                  | 0.23      | 7.23 | 27.87            |
| 7.50     | 1.01           | 0.61           | 0.05           | 1.00                      | 482                  | 0.16      | 7.18 | 27.80            |
| 8.00     | 1.12           | 0.61           | 0.04           | 2.17                      | 492                  | 0.16      | 7.16 | 27.40            |

**Average water quality data for March**

| Depth(m) | Ammonia (mg/L) | Nitrite (mg/L) | Nitrate (mg/L) | Reactive phosphate (mg/L) | Conductivity (μS/cm) | DO (mg/L) | pH   | Temperature (°C) |
|----------|----------------|----------------|----------------|---------------------------|----------------------|-----------|------|------------------|
| 0.00     | 0.04           | 0.06           | 0.52           | 0.20                      | 156                  | 8.30      | 8.12 | 29.0             |
| 0.50     | 0.04           | 0.07           | 0.40           | 0.21                      | 176                  | 7.75      | 8.11 | 28.8             |
| 1.00     | 0.05           | 0.08           | 0.38           | 0.23                      | 185                  | 7.26      | 8.09 | 28.7             |
| 1.50     | 0.06           | 0.11           | 0.34           | 0.25                      | 194                  | 6.94      | 8.06 | 28.6             |
| 2.00     | 0.07           | 0.13           | 0.31           | 0.26                      | 211                  | 6.08      | 7.88 | 28.5             |
| 2.50     | 0.07           | 0.15           | 0.29           | 0.27                      | 221                  | 4.94      | 7.80 | 28.2             |
| 3.00     | 0.08           | 0.15           | 0.27           | 0.29                      | 236                  | 4.67      | 7.50 | 28.0             |
| 3.50     | 0.09           | 0.17           | 0.27           | 0.32                      | 251                  | 4.41      | 7.41 | 28.0             |
| 4.00     | 0.11           | 0.18           | 0.21           | 0.34                      | 257                  | 3.64      | 7.39 | 27.9             |
| 4.50     | 0.11           | 0.21           | 0.18           | 0.34                      | 264                  | 3.32      | 7.36 | 27.8             |
| 5.00     | 0.11           | 0.22           | 0.16           | 0.31                      | 272                  | 2.99      | 7.31 | 27.7             |
| 5.50     | 0.14           | 0.25           | 0.15           | 0.32                      | 287                  | 2.42      | 7.27 | 27.7             |
| 6.00     | 0.18           | 0.31           | 0.12           | 0.35                      | 295                  | 0.26      | 7.26 | 27.6             |
| 6.50     | 0.55           | 0.43           | 0.10           | 0.39                      | 331                  | 0.12      | 7.23 | 27.6             |
| 7.00     | 0.62           | 0.48           | 0.08           | 0.51                      | 351                  | 0.08      | 7.15 | 27.5             |
| 7.50     | 0.66           | 0.52           | 0.04           | 1.15                      | 365                  | 0.06      | 7.13 | 27.4             |
| 8.00     | 0.76           | 0.54           | 0.04           | 1.89                      | 377                  | 0.06      | 7.10 | 27.3             |

**Average water quality data for May**

| Depth(m) | Ammonia (mg/L) | Nitrite (mg/L) | Nitrate (mg/L) | Reactive phosphate (mg/L) | Conductivity (µS/cm) | DO (mg/L) | pH   | Temperature (°C) |
|----------|----------------|----------------|----------------|---------------------------|----------------------|-----------|------|------------------|
| 0.00     | 0.05           | 0.08           | 0.46           | 0.22                      | 250                  | 7.89      | 8.06 | 29.1             |
| 0.50     | 0.05           | 0.14           | 0.36           | 0.22                      | 259                  | 6.57      | 8.06 | 28.7             |
| 1.00     | 0.05           | 0.16           | 0.35           | 0.23                      | 269                  | 6.24      | 8.04 | 28.4             |
| 1.50     | 0.05           | 0.21           | 0.22           | 0.26                      | 274                  | 6.07      | 8.02 | 28.2             |
| 2.00     | 0.05           | 0.24           | 0.24           | 0.30                      | 286                  | 5.41      | 7.93 | 28.3             |
| 2.50     | 0.05           | 0.26           | 0.21           | 0.31                      | 298                  | 4.82      | 7.87 | 28.2             |
| 3.00     | 0.07           | 0.36           | 0.21           | 0.34                      | 324                  | 4.48      | 7.69 | 28.2             |
| 3.50     | 0.07           | 0.38           | 0.20           | 0.35                      | 335                  | 4.32      | 7.64 | 27.6             |
| 4.00     | 0.08           | 0.45           | 0.17           | 0.35                      | 345                  | 3.72      | 7.49 | 27.6             |
| 4.50     | 0.13           | 0.79           | 0.16           | 0.36                      | 358                  | 2.28      | 7.33 | 27.6             |
| 5.00     | 0.25           | 0.92           | 0.10           | 0.36                      | 379                  | 0.10      | 7.30 | 27.6             |
| 5.50     | 0.27           | 1.24           | 0.09           | 1.10                      | 395                  | 0.09      | 7.24 | 27.5             |
| 6.00     | 0.29           | 1.38           | 0.07           | 1.43                      | 452                  | 0.09      | 7.18 | 27.2             |

**Average water quality data for October**

| Depth(m) | Ammonia (mg/L) | Nitrite (mg/L) | Nitrate (mg/L) | Reactive phosphate (mg/L) | Conductivity (µS/cm) | DO (mg/L) | pH   | Temperature (°C) |
|----------|----------------|----------------|----------------|---------------------------|----------------------|-----------|------|------------------|
| 0.00     | 0.05           | 0.20           | 0.53           | 0.09                      | 323                  | 7.17      | 8.65 | 28.8             |
| 0.50     | 0.07           | 0.43           | 0.48           | 0.11                      | 336                  | 6.89      | 8.63 | 28.7             |
| 1.00     | 0.10           | 0.50           | 0.43           | 0.11                      | 387                  | 6.46      | 8.60 | 28.6             |
| 1.50     | 0.11           | 0.57           | 0.30           | 0.11                      | 434                  | 5.17      | 8.55 | 28.3             |
| 2.00     | 0.13           | 0.73           | 0.21           | 0.11                      | 568                  | 3.75      | 8.45 | 27.6             |
| 2.50     | 0.17           | 1.23           | 0.17           | 0.51                      | 672                  | 2.52      | 8.25 | 27.7             |
| 3.00     | 0.23           | 1.37           | 0.09           | 0.72                      | 814                  | 0.54      | 8.14 | 27.5             |
| 3.50     | 0.39           | 1.67           | 0.05           | 1.23                      | 928                  | 0.14      | 7.95 | 27.2             |

### Average water quality data for November

| Depth(m) | Ammonia (mg/L) | Nitrite (mg/L) | Nitrate (mg/L) | Reactive phosphate (mg/L) | Conductivity (µS/cm) | DO (mg/L) | pH  | Temperature (°C) |
|----------|----------------|----------------|----------------|---------------------------|----------------------|-----------|-----|------------------|
| 0.00     | 0.12           | 0.33           | 1.15           | 0                         | 184.33               | 6.70      | 7.0 | 29.4             |
| 0.50     | 0.14           | 0.47           | 0.76           | 0                         | 208.67               | 6.30      | 7.2 | 29.4             |
| 1.00     | 0.16           | 0.57           | 0.65           | 0                         | 242.33               | 5.92      | 6.9 | 29.3             |
| 1.50     | 0.21           | 0.63           | 0.61           | 0                         | 277.33               | 5.19      | 6.9 | 29.3             |
| 2.00     | 0.50           | 1.57           | 0.58           | 0                         | 309.67               | 3.86      | 6.8 | 29.1             |
| 2.50     | 0.60           | 2.00           | 0.31           | 1                         | 383.67               | 3.50      | 6.8 | 29.0             |
| 3.00     | 0.70           | 2.27           | 0.16           | 1                         | 400.67               | 3.27      | 6.6 | 29.0             |
| 3.50     | 0.79           | 4.43           | 0.04           | 1                         | 560.67               | 1.48      | 6.6 | 29.0             |
| 4.00     | 1.09           | 5.20           | 0.02           | 2                         | 692.00               | 0.11      | 6.5 | 29.0             |

### Average water quality data for December

| Depth(m) | Ammonia (mg/L) | Nitrite (mg/L) | Nitrate (mg/L) | Reactive phosphate (mg/L) | Conductivity (µS/cm) | DO (mg/L) | pH   | Temperature (°C) |
|----------|----------------|----------------|----------------|---------------------------|----------------------|-----------|------|------------------|
| 0.00     | 0.20           | 1.62           | 1.39           | 0.20                      | 229                  | 6.70      | 7.60 | 28.2             |
| 0.50     | 0.25           | 1.80           | 1.16           | 0.25                      | 241                  | 6.17      | 7.30 | 28.0             |
| 1.00     | 0.32           | 2.17           | 0.57           | 0.93                      | 296                  | 4.54      | 7.07 | 27.7             |
| 1.50     | 0.45           | 2.97           | 0.46           | 1.33                      | 446                  | 2.27      | 6.90 | 27.5             |
| 2.00     | 1.13           | 4.23           | 0.24           | 2.40                      | 609                  | 0.43      | 6.70 | 27.1             |
| 2.50     | 1.40           | 5.07           | 0.10           | 2.93                      | 810                  | 0.05      | 6.47 | 26.7             |
| 3.00     | 2.07           | 5.80           | 0.09           | 3.11                      | 1183                 | 0.01      | 6.27 | 26.6             |
